# Supplementary material for: A Tumor-Targeted Replicating Oncolytic Adenovirus Ad-TD-nsIL12 as a Promising Therapeutic Agent for Human Esophageal Squamous Cell Carcinoma
Source: Cells. 2020 Nov 10;9(11):2438. doi: 10.3390/cells9112438 (PMC7698064; doi:10.3390/cells9112438)
Supplement: Supplementary file 1 [file cells-09-02438-s001.pdf]

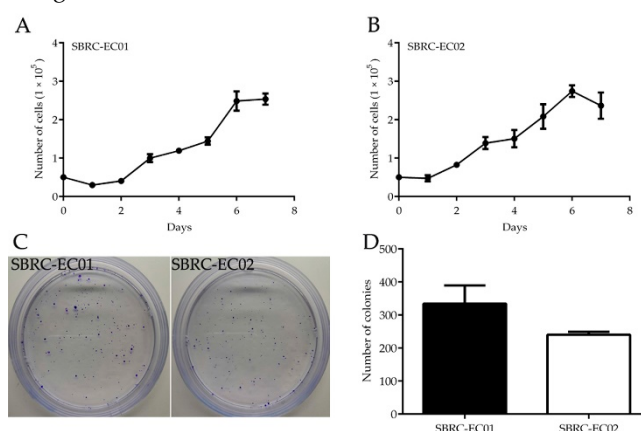

**Figure S1.** Growth curves and clone formation rates of SBRC-EC01 and SBRC-EC02 cells at passage 15. (A) The growth curve of SBRC-EC01, showing the lag and exponential phase. The population doubling time was 62 h; (B) The growth curve of SBRC-EC02. The population doubling time was 58 h; (C), (D) The clone formation rate was calculated at 2 weeks after 600 single cells seeded into a 100 mm culture plate. Data are shown as the mean ± SD of three independent experiments.

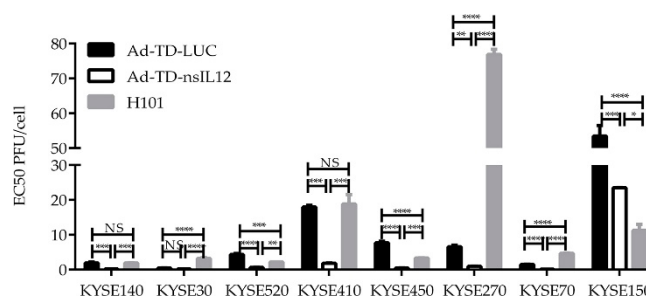

**Figure S2.** Cytotoxicity of AD-TD-LUC, Ad-TD-nsIL12 and H101 in a panel of human ESCC cell lines. Data are shown as the mean ± SD of three independent experiments and analyzed by one way ANOVA.

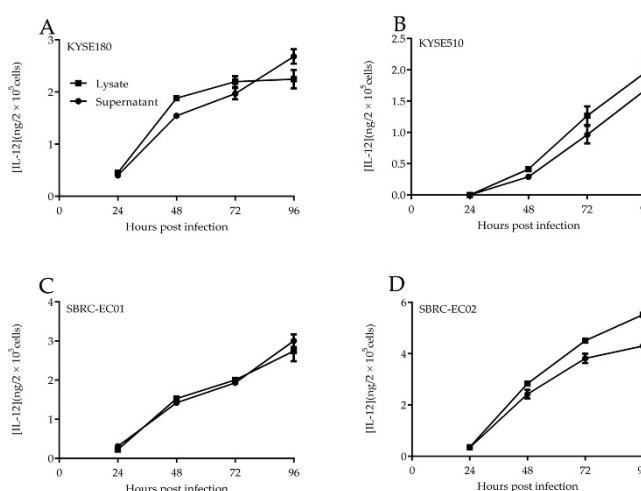

**Figure S3.** The production of IL-12 by Ad-TD-nsIL12 in infected tumor cells. To detect IL-12 from Ad-TD- nsIL12 *in vitro*, tumor cells were infected with Ad-TD- nsIL12 at a MOI of 5 PFU/cell. Cell culture

supernatant and lysate were collected every 24 h for 96 h and assayed by ELISA. All experiments were performed in triplicate.

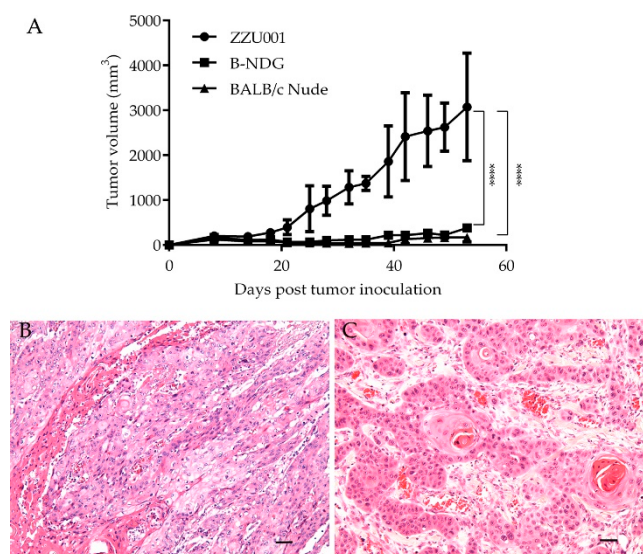

**Figure S4.** Compared with B-NDG mice and BALB/c Nude mice, SBRC-EC01 has stronger tumorigenicity in immune-deficient Syrian hamster (IL2RG<sup>-/-</sup>, named ZZU001). (A) The tumorigenesis curves of SBRC-EC01 in B-NDG mice, BALB/c Nude mice and ZZU001 hamsters are shown; (B) H&E staining of original tumor; (C) H&E staining of subcutaneous tumor. The tumor volume was measured twice a week. The data are expressed by mean  $\pm$  SD ( $n = 3$ ), and analyzed by two way ANOVA. \*\*\*\*,  $p < 0.0001$ . Scale: 50  $\mu$ m.

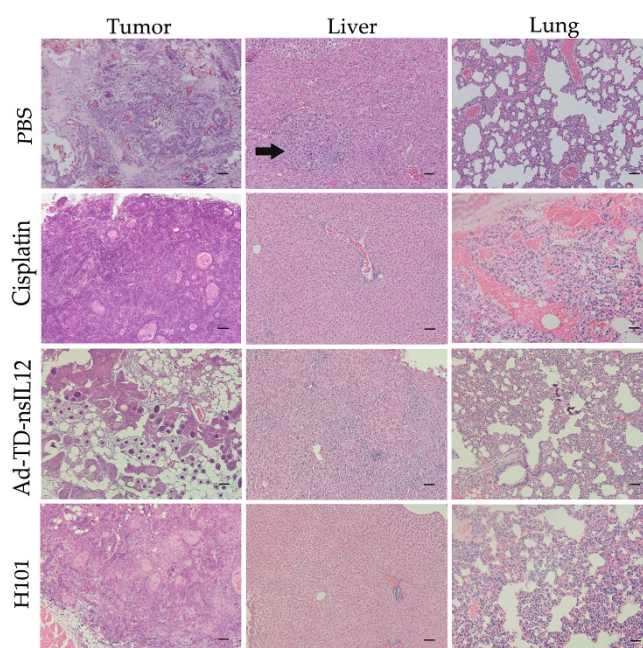

**Figure S5.** Histological analysis of SBRC-EC01 tumors. Ad-TD-nsIL12 could inhibit the growth and metastasis of tumors. Liver metastasis occurred in PBS group. The arrow shows metastatic deposits.

**Table S1.** STR matching analysis of SBRC-EC01 and SBRC-EC02.

| Locus   | SBRC-EC01   | SBRC-EC02 |
|---------|-------------|-----------|
| D5S818  | 11,12,13,14 | 10,10     |
| D13S317 | 9,12,13     | 8,8       |
| D7S820  | 10,11       | 11,11     |
| D16S539 | 9,11        | 11,12     |
| VWA     | 16,17,19    | 14,14     |
| TH01    | 8,8         | 6,6       |
| AM      | X,X         | X,X       |
| TPOX    | 8,11        | 8,11      |
| CSF1PO  | 12,15       | 11,11     |

**Table S2.** Drug sensitivity on ESCC cell lines and the two PDCs

| Cell lines | IC50 (mean $\pm$ SD, $\mu$ M) |                    |
|------------|-------------------------------|--------------------|
|            | Cisplatin                     | 5-fluorouracil     |
| KYSE150    | 29.6 $\pm$ 0.98               | 3.9 $\pm$ 0.08     |
| KYSE510    | 2.56 $\pm$ 0.19               | 92.08 $\pm$ 7.64   |
| KYSE140    | 2.46 $\pm$ 0.11               | 13.97 $\pm$ 0.28   |
| KYSE410    | 18.94 $\pm$ 0.76              | 6.15 $\pm$ 0.25    |
| KYSE30     | 25.54 $\pm$ 3.03              | 16.53 $\pm$ 1.13   |
| KYSE520    | 16.98 $\pm$ 0.55              | 314.63 $\pm$ 40.86 |
| KYSE450    | 6.36 $\pm$ 0.05               | 2.72 $\pm$ 0.12    |
| KYSE180    | 4.52 $\pm$ 0.39               | 1.58 $\pm$ 0.37    |
| KYSE70     | 7.84 $\pm$ 0.12               | 2.85 $\pm$ 0.31    |
| KYSE270    | 4.58 $\pm$ 0.1                | 2.04 $\pm$ 0.43    |
| SBRC-EC01  | 7.48 $\pm$ 0.55               | 4.72 $\pm$ 0.54    |
| SBRC-EC02  | 5.55 $\pm$ 0.15               | 148.47 $\pm$ 9.18  |
